# Supplementary material for: From malaria to cancer: Computational drug repositioning of amodiaquine using PLIP interaction patterns
Source: PubMed Central journal article supplement (PMC5595859; doi:10.1038/s41598-017-11924-4), 2017-09-12
Supplement: 41598_2017_11924_MOESM1_ESM.pdf [file 41598_2017_11924_MOESM1_ESM.pdf]

# From malaria to cancer: Computational drug repositioning of amodiaquine using PLIP interaction patterns

Sebastian Salentin<sup>1†</sup>, Melissa F. Adasme<sup>1†</sup>, Jörg C. Heinrich<sup>1</sup>, V. Joachim Haupt<sup>1</sup>, Simone Daminelli<sup>1</sup>, Yixin Zhang<sup>2</sup> & Michael Schroeder<sup>1\*</sup>

**1** Biotechnology Center (BIOTEC), Technische Universität Dresden, 01307 Dresden, Germany

**2** B CUBE, Center for Molecular Bioengineering, Technische Universität Dresden, 01307 Dresden, Germany

\* ms@biotec.tu-dresden.de

†these authors contributed equally to this work

## Data

Three files with raw data from intermediate steps of the analysis workflow are provided as supplementary data:

- **S1\_dataset1.tds. Screening dataset.** Dataset of 107,663 complexes used for virtual screening of BVDU interaction patterns. Listed are the PDB ID, HET ID of the ligand, its assigned chain and position in the chain.
- **S1\_dataset2.tds. Non-redundant dataset after screening.** Non-redundant dataset of 15,712 complexes after virtual screening. Listed are the PDB ID, HET ID of the ligand, its assigned chain and position in the chain.
- **S1\_chemsim.tds. Pairwise chemical similarity.** Pairwise chemical similarity values of the 58 compounds in the candidate set. The given values are Tanimoto similarities between the standard PubChem chemical fingerprint (between 0 and 100 % similarity). Compounds are reference with their PubChem CID.

Supplementary Table 1 is supplied as a separate Excel spreadsheet (SI\_candidate\_compounds.xlsx).

# Figures

**A** Docking with thymidine kinase

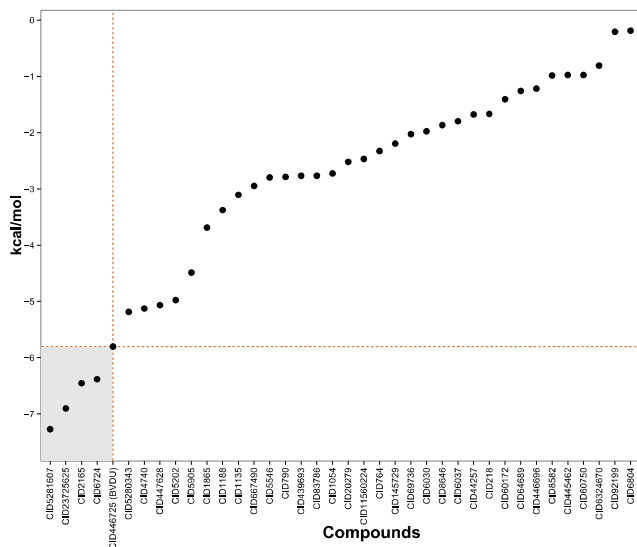

**B** Docking with HSP27

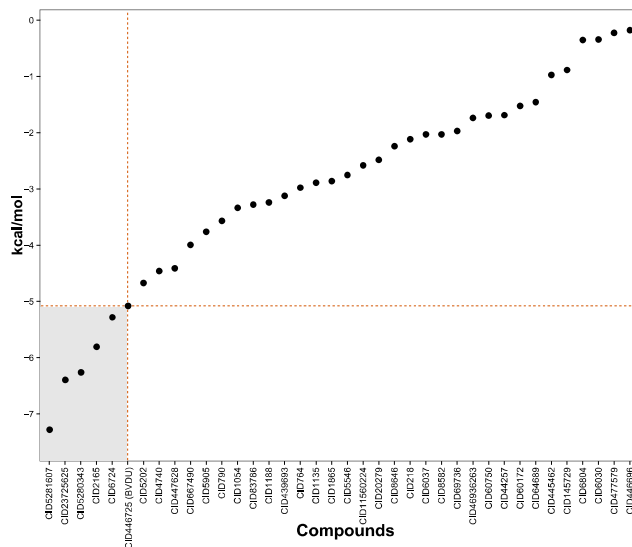

**Supplementary Figure 1. Docking Results for candidate compounds to viral thymidine kinase (left) and the Hsp27 model (right).** Predicted binding energies are shown on the ordinate in kcal/mol. Compounds are listed on the abscissa with their PubChem CIDs. BVDU was used as a reference compound and its data points are indicated with dotted lines.

## Tables

**Supplementary Table 1. Candidate compounds after virtual screening.** Detailed information is listed for all compounds having 6 or more matching BVDU interaction patterns (candidate set). Listed for each compound are its PubChem Compound ID (CID), the name, its status as a drug (approved, clinical, or experimental), the chemical class as described in the manuscript, and the number of matched BVDU patterns.
